# Supplementary material for: Novel issues of morphology, size, and structure of Pt nanoparticles in chemical engineering: surface attachment, aggregation or agglomeration, assembly, and structural changes
Source: Royal Society of Chemistry journal article supplement (doi:10.1039/c2nj40027h), 2012-01-01
Supplement: c2nj40027h.pdf [file c2nj40027h.pdf]

## Electronic supplementary information

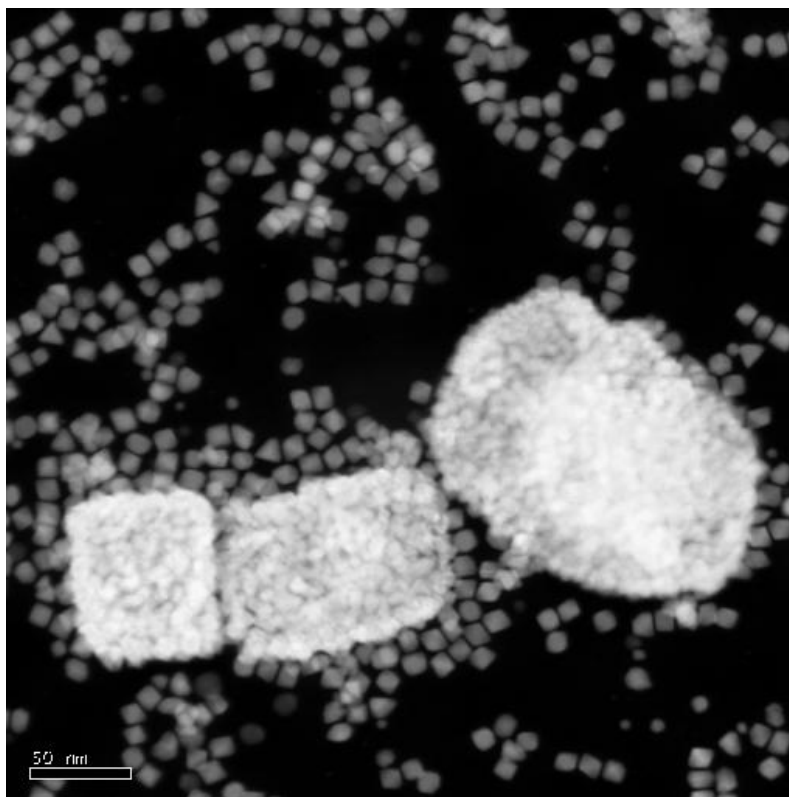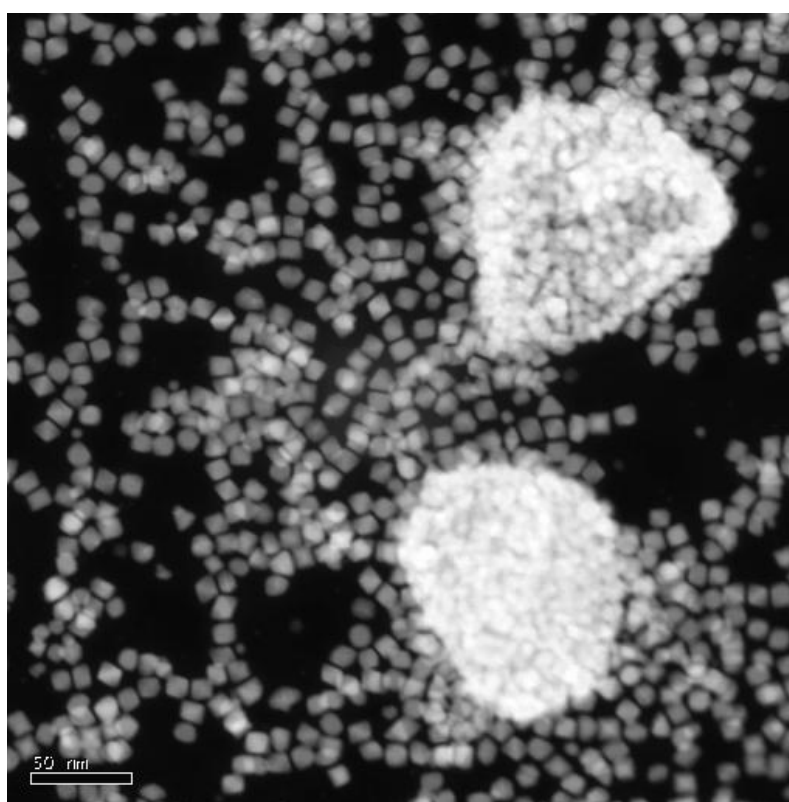

Self-assembly of Pt nanoparticles is discovered. Novel Pt nanotextures show evidences originating from surface-attachment, self-aggregation, self-agglomeration and self-assembly through novel discoveries of surface attachments.
